# Supplementary material
Source: ML conference proceedings conference paper supplement (https://proceedings.mlr.press/v161/ding21c.html)
Supplement: Supplementary file [file ding21c-supp.pdf]

---

# PALM: Probabilistic Area Loss Minimization for Protein Sequence Alignment (Supplementary Materials)

---

Fan Ding<sup>\*1</sup>

Nan Jiang<sup>\*1</sup>

Jianzhu Ma<sup>2</sup>

Jian Peng<sup>3</sup>

Jinbo Xu<sup>4</sup>

Yexiang Xue<sup>1</sup>

<sup>1</sup>Department of Computer Science, Purdue University, West Lafayette, Indiana, USA

<sup>2</sup>Institute for Artificial Intelligence, Peking University, Beijing, China

<sup>3</sup>Department of Computer Science, University of Illinois at Urbana-Champaign, Illinois, USA

<sup>4</sup>Toyota Technological Institute at Chicago, Illinois, USA

## 1 PROOF OF THEOREM 1

Theorem 1 states the function value of the output of PALM, in expectation converges to the true optimum within a small constant distance at a linear speed w.r.t. the number of iterations  $T$ . To prove Theorem 1, we need the following lemma.

**Lemma 1.** *If the total variation  $\max_{\theta} \text{Var}_{P_{\theta}}(\phi(a)) \leq L$ , then  $l(\theta)$  is  $L$ -smooth w.r.t.  $\theta$ .*

### 1.1 PROOF OF LEMMA 1

*Proof.*  $L$ -smoothness requires that

$$\|\nabla \mathcal{L}_{LB}(\theta_1) - \nabla \mathcal{L}_{LB}(\theta_2)\|_2 \leq L \|\theta_1 - \theta_2\|_2,$$

where  $\forall \theta_1, \theta_2 \in \text{dom } f$  and  $L$  is a constant. Based on the mean value theorem, there exists a point  $\tilde{\theta} \in (\theta_1, \theta_2)$  such that

$$\nabla \mathcal{L}_{LB}(\theta_1) - \nabla \mathcal{L}_{LB}(\theta_2) = \nabla(\nabla \mathcal{L}_{LB}(\tilde{\theta}))(\theta_1 - \theta_2).$$

Taking the  $L_2$  norm for both sides, we have

$$\|\nabla \mathcal{L}_{LB}(\theta_1) - \nabla \mathcal{L}_{LB}(\theta_2)\|_2 = \|\nabla(\nabla \mathcal{L}_{LB}(\tilde{\theta}))(\theta_1 - \theta_2)\|_2 \leq \|\nabla(\nabla \mathcal{L}_{LB}(\tilde{\theta}))\|_2 \|\theta_1 - \theta_2\|_2$$

Then, the problem is to bound the matrix 2-norm  $\|\nabla(\nabla \mathcal{L}_{LB}(\tilde{\theta}))\|_2$ . Since we know the explicit form of  $\mathcal{L}_{LB}(\theta)$ , we know

$$\begin{aligned} \nabla \mathcal{L}_{LB}(\theta) &= \nabla \log Z_{\phi} - \phi(a), \\ \nabla(\nabla \mathcal{L}_{LB}(\theta)) &= \sum_a [\phi(a) - \nabla \log Z_{\phi}][\phi(a) - \nabla \log Z_{\phi}]^T P_{\theta}(a), \end{aligned}$$

where  $\nabla(\nabla \mathcal{L}_{LB}(\theta))$  is the co-variance matrix. Denote  $\text{Cov}_{\theta}[\phi(a)] = \nabla(\nabla \mathcal{L}_{LB}(\theta))$ , which is both symmetric and positive semi-definite. We have

$$\|\nabla(\nabla \mathcal{L}_{LB}(\tilde{\theta}))\|_2 = \|\text{Cov}_{\tilde{\theta}}[\phi(a)]\|_2 = \lambda_{\max},$$

where  $\lambda_{\max}$  is the maximum eigenvalue of the matrix  $\text{Cov}_{\theta}[\phi(a)]$ . Then, because of the positive semi-definiteness of the co-variance matrix, all the eigenvalues are non-negative, and we can bound  $\lambda_{\max}$  as

$$\lambda_{\max} \leq \sum_i \lambda_i = \text{Tr}(\text{Cov}_{\theta}[\phi(a)]),$$

---

<sup>\*</sup>These authors contribute equally.

where  $Tr(\text{Cov}_\theta[\phi(a)])$  is the trace of matrix  $\text{Cov}_\theta[\phi(a)]$ .  $Tr(\text{Cov}_\theta[\phi(a)])$  can be further derived as:

$$Tr(\text{Cov}_\theta[\phi(a)]) = \mathbb{E}_{P_\theta}[\|\phi(a)\|_2^2] - \|\mathbb{E}_{P_\theta}[\phi(a)]\|_2^2,$$

which is equal to the total variation  $Var_{P_\theta}(\phi(a))$ , we have

$$\|\nabla(\nabla\mathcal{L}_{LB}(\tilde{\theta}))\|_2 \leq Var_{P_\theta}(\phi(X)) \leq L.$$

Therefore, we have

$$\|\nabla l(\theta_1) - \nabla l(\theta_2)\|_2 \leq L \|\theta_1 - \theta_2\|_2.$$

This completes the proof.  $\square$

## 1.2 PROOF OF THEOREM 1

*Proof.* By L-smooth of  $\mathcal{L}_{LB}$ , we have for the  $t$ -th iteration,

$$\begin{aligned} \mathcal{L}_{LB}(\theta_{t+1}) &\leq \mathcal{L}_{LB}(\theta_t) + \langle \nabla\mathcal{L}_{LB}(\theta_t), \theta_{t+1} - \theta_t \rangle + \frac{L}{2} \|\theta_{t+1} - \theta_t\|_2^2, \\ &= \mathcal{L}_{LB}(\theta_t) - \eta \langle \nabla\mathcal{L}_{LB}(\theta_t), g_t \rangle + \frac{L\eta^2}{2} \|g_t\|_2^2. \end{aligned}$$

Because of  $\mathbb{E}[g_t]^2 = \mathbb{E}[\|g_t\|_2^2] - Var(g_t)$ , by taking expectation on both sides w.r.t  $g_t$  we get

$$\begin{aligned} \mathbb{E}[\mathcal{L}_{LB}(\theta_{t+1})] &= \mathcal{L}_{LB}(\theta_t) - \eta \mathbb{E}[g_t]^2 + \frac{L\eta^2}{2} \mathbb{E}[\|g_t\|_2^2] = \mathcal{L}_{LB}(\theta_t) - \eta(\mathbb{E}[\|g_t\|_2^2] - Var(g_t)) + \frac{L\eta^2}{2} \mathbb{E}[\|g_t\|_2^2], \\ &\leq \mathcal{L}_{LB}(\theta_t) - \eta(1 - \frac{L\eta}{2}) \mathbb{E}[\|g_t\|_2^2] + \frac{\eta\sigma^2}{M}, \\ &\leq \mathcal{L}_{LB}(\theta_t) - \frac{\eta}{2} \mathbb{E}[\|g_t\|_2^2] + \frac{\eta\sigma^2}{M}. \end{aligned}$$

where the last inequality follows as  $L\eta \leq 2$ . Because  $\mathcal{L}_{LB}$  is convex, we get

$$\begin{aligned} \mathbb{E}[\mathcal{L}_{LB}(\theta_{t+1})] &\leq \mathcal{L}_{LB}(\theta^*) + \langle \nabla\mathcal{L}_{LB}(\theta_t), \theta_t - \theta^* \rangle - \frac{\eta}{2} \mathbb{E}[\|g_t\|_2^2] + \eta\sigma^2, \\ &= \mathcal{L}_{LB}(\theta^*) + \langle \mathbb{E}[g_t], \theta_t - \theta^* \rangle - \frac{\eta}{2} \mathbb{E}[\|g_t\|_2^2] + \frac{\eta\sigma^2}{M}, \\ &= \mathcal{L}_{LB}(\theta^*) + \mathbb{E}[\langle g_t, \theta_t - \theta^* \rangle - \frac{\eta}{2} \|g_t\|_2^2] + \frac{\eta\sigma^2}{M}. \end{aligned}$$

we now repeat the calculations by completing the square for the middle two terms to get

$$\begin{aligned} \mathbb{E}[\mathcal{L}_{LB}(\theta_{t+1})] &\leq \mathcal{L}_{LB}(\theta^*) + \mathbb{E}[\frac{1}{2\eta}(\|\theta_t - \theta^*\|_2^2 - \|\theta_t - \theta^* - \eta g_t\|_2^2)] + \frac{\eta\sigma^2}{M}, \\ &= \mathcal{L}_{LB}(\theta^*) + \mathbb{E}[\frac{1}{2\eta}(\|\theta_t - \theta^*\|_2^2 - \|\theta_{t+1} - \theta^*\|_2^2)] + \frac{\eta\sigma^2}{M}. \end{aligned}$$

Summing the above equations for  $t = 0, \dots, T-1$ , we get

$$\sum_{t=0}^{T-1} \mathbb{E}[\mathcal{L}_{LB}(\theta_{t+1}) - \mathcal{L}_{LB}(\theta^*)] \leq \frac{1}{2\eta}(\|\theta_0 - \theta^*\|_2^2 - \mathbb{E}[\|\theta_T - \theta^*\|_2^2]) + T \frac{\eta\sigma^2}{M} \leq \frac{\|\theta_0 - \theta^*\|_2^2}{2\eta} + T \frac{\eta\sigma^2}{M}.$$

Finally, by Jensen's inequality,  $T\mathcal{L}_{LB}(\overline{\theta}_T) \leq \sum_{t=1}^T \mathcal{L}_{LB}(\theta_t)$ , thus,

$$\sum_{t=0}^{T-1} \mathbb{E}[\mathcal{L}_{LB}(\theta_{t+1}) - \mathcal{L}_{LB}(\theta^*)] = \mathbb{E}[\sum_{t=1}^T \mathcal{L}_{LB}(\theta_t)] - T\mathcal{L}_{LB}(\theta^*) \geq T\mathbb{E}[\mathcal{L}_{LB}(\overline{\theta}_T)] - T\mathcal{L}_{LB}(\theta^*).$$

Combining the above equations we get

$$\mathbb{E}[\mathcal{L}_{LB}(\overline{\theta}_T)] \leq \mathcal{L}_{LB}(\theta^*) + \frac{\|\theta_0 - \theta^*\|_2^2}{2\eta T} + \frac{\eta\sigma^2}{M}.$$

This completes the proof.  $\square$
